# Supplementary material
Source: PubMed Central journal article supplement (PMC4922003)
Supplement: NIHMS621456-supplement-Supplement.pdf [file NIHMS621456-supplement-Supplement.pdf]

- 1 Supplementary Table 1: Percent of each volatile compound derived from hexose, determined by  
 2 [ $^{13}\text{C}$ ] glucose labeling experiments. Values are based on same data set as shown in Figure 3.

| Compound                | Mean (%) | SE <sup>b</sup> (%) | Grouping <sup>a</sup> |
|-------------------------|----------|---------------------|-----------------------|
| Octanoic acid           | 122.29   | 2.81                | A                     |
| Ethyl 3-hydroxybutyrate | 121      | 7.39                | A B                   |
| Hexanoic acid           | 110.8    | 3.35                | A B C                 |
| Isoamyl acetate         | 103.19   | 1.31                | A B C D               |
| Ethyl hexanoate         | 102.12   | 8.24                | A B C D E             |
| Isobutyl alcohol        | 96.92    | 3.03                | B C D E               |
| Decanoic acid           | 96.83    | 6.27                | B C D E               |
| Ethyl octanoate         | 96.12    | 6.63                | B C D E               |
| Ethanol                 | 94.16    | 0.26                | C D E                 |
| Isoamyl alcohol         | 93.98    | 1.40                | C D E                 |
| Phenylethyl acetate     | 93.1     | 3.19                | C D E                 |
| Acetic acid             | 92.39    | 3.73                | C D E                 |
| Ethyl Lactate           | 86.14    | 3.42                | C D E F               |
| $\beta$ -Phenylethanol  | 81.91    | 3.16                | D E F G               |
| Methionol               | 77.36    | 2.90                | E F G H               |
| 1-Butanol               | 61.49    | 2.50                | F G H                 |
| Hexyl acetate           | 60.06    | 8.64                | G H                   |
| Isobutyric acid         | 52.65    | 9.88                | H                     |
| 1-Hexanol               | 6.79     | 1.62                | I                     |

3 <sup>a</sup>Rows with different letters are significantly different using Tukey's test.  $p < 0.05$  was  
 4 considered significant.

5 <sup>b</sup>SE is standard error of the mean

6

7
